# Supplementary material for: Regulation of the adaptation to ER stress by KLF4 facilitates melanoma cell metastasis via upregulating NUCB2 expression
Source: J Exp Clin Cancer Res. 2018 Jul 28;37:176. doi: 10.1186/s13046-018-0842-z (PMC6064624; doi:10.1186/s13046-018-0842-z)
Supplement: Supplementary file 1 — Table S2. Clinical information of Patients with melanoma. (XLSX 11 kb) [file 13046_2018_842_MOESM1_ESM.xlsx]

## Sheet: ME1005a Specs
Description	melanoma
Cases	30
Diameter	5
Rows	6
Columns	10
Position	tissue type	Age	Sex	Organ/Anatomic Site	Pathology diagnosis	TNM	Grade	Stage	Type
A1	carcinoma	60	M	Skin	Malignant melanoma of sole of foot	T2N1M0		III	Malignant
A2	adjacent	60	M	Skin
A3	carcinoma	38	M	Skin	Malignant melanoma of right sole of foot	T3N1M0		III	Malignant
A4	adjacent	38	M	Skin
A5	carcinoma	42	M	Skin	Malignant melanoma of left heel	T3N2M0		III	Malignant
A6	adjacent	42	M	Skin
A7	carcinoma	46	F	Skin	Malignant melanoma of thigh	T4N1M0		III	Malignant
A8	adjacent	46	F	Skin
A9	carcinoma	61	M	Skin	Malignant melanoma of right thigh	T4N2M0		III	Malignant
A10	adjacent	61	M	Skin
B1	carcinoma	40	M	Skin	Malignant melanoma of right chest wall	T4N0M0		II	Malignant
B2	adjacent	40	M	Skin
B3	carcinoma	60	M	Skin	Malignant melanoma of right arm	T4N0M0		IIA	Malignant
B4	adjacent	60	M	Skin
B5	carcinoma	51	M	Skin	Malignant melanoma of back	T4N0M0		IIA	Malignant
B6	adjacent	51	M	Skin
B7	carcinoma	37	M	Skin	Malignant melanoma of right arm	T4N0M0		II	Malignant
B8	adjacent	37	M	Skin
B9	carcinoma	60	M	Skin	Malignant melanoma of left sole of foot	T4bN0M0		IIC	Malignant
B10	adjacent	60	M	Skin
C1	carcinoma	42	F	Skin	Malignant melanoma of left thumb	T4N0M0		IIB	Malignant
C2	adjacent	42	F	Skin
C3	carcinoma	45	M	Skin	Malignant melanoma of crissum	T4N0M0		IIB	Malignant
C4	adjacent	45	M	Skin
C5	carcinoma	45	F	Skin	Malignant melanoma of chest wall	T4N0M0		IIA	Malignant
C6	adjacent	45	F	Skin
C7	carcinoma	80	M	Skin	Malignant melanoma of right sole of foot	T4N0M0		II	Malignant
C8	adjacent	80	M	Skin
C9	carcinoma	52	M	Skin	Malignant melanoma of left abdominal wall	T4N0M0		IIA	Malignant
C10	adjacent	52	M	Skin
D1	carcinoma	38	M	Skin	Malignant melanoma of right thigh	T4N2M0		III	Malignant
D2	adjacent	38	M
D3	carcinoma	53	F	Bladder	Malignant melanoma	-		-	Malignant
D4	adjacent	53	F	Bladder
D5	carcinoma	44	F	Uterine cervix	Malignant melanoma	-		-	Malignant
D6	adjacent	44	F	Uterine cervix
D7	carcinoma	46	M	Scrotum	Malignant melanoma	-		-	Malignant
D8	adjacent	46	M	Scrotum
D9	carcinoma	52	M	Skin	Malignant melanoma of anorectum	-		-	Malignant
D10	adjacent	52	M	Skin
E1	carcinoma	38	F	Vulva	Malignant melanoma	T4N0M0		IIB	Malignant
E2	adjacent	38	F	Vulva
E3	carcinoma	57	F	Vulva	Malignant melanoma	T4N0M0		II	Malignant
E4	adjacent	57	F	Vulva
E5	carcinoma	62	F	Vulva	Malignant melanoma	T4N0M0		IIB	Malignant
E6	adjacent	62	F	Vulva
E7	carcinoma	50	M	Skin	Malignant melanoma of left shoulder	T4N0M0		II	Malignant
E8	adjacent	50	M	Skin
E9	carcinoma	7	M	Skin	Malignant melanoma of sacrococcygeal region	T4N0M0		II	Malignant
E10	adjacent	7	M	Skin
F1	carcinoma	46	F	Skin	Malignant melanoma of right chest wall	T4N0M0		II	Malignant
F2	adjacent	46	F	Skin
F3	carcinoma	71	M	Skin	Malignant melanoma of right arm	T4N0M0		II	Malignant
F4	adjacent	71	M	Skin
F5	carcinoma	42	F	Skin	Malignant melanoma of right thigh	T4N0M0		II	Malignant
F6	adjacent	42	F	Skin
F7	carcinoma	46	F	Skin	Malignant melanoma of right hallux	T4N0M0		II	Malignant
F8	adjacent	46	F	Skin
F9	carcinoma	58	F	Skin	Malignant melanoma of left buttock	T4N0M0		II	Malignant
F10	adjacent	58	F	Skin
